# Supplementary material for: Anisohydric sugar beet rapidly responds to light to optimize leaf water use efficiency utilizing numerous small stomata
Source: PubMed Central journal article supplement (PMC7780706; doi:10.1093/aobpla/plaa067), 2020-12-02
Supplement: plaa067_suppl_supplementary_figure_s1.pdf [file plaa067_suppl_supplementary_figure_s1.pdf]

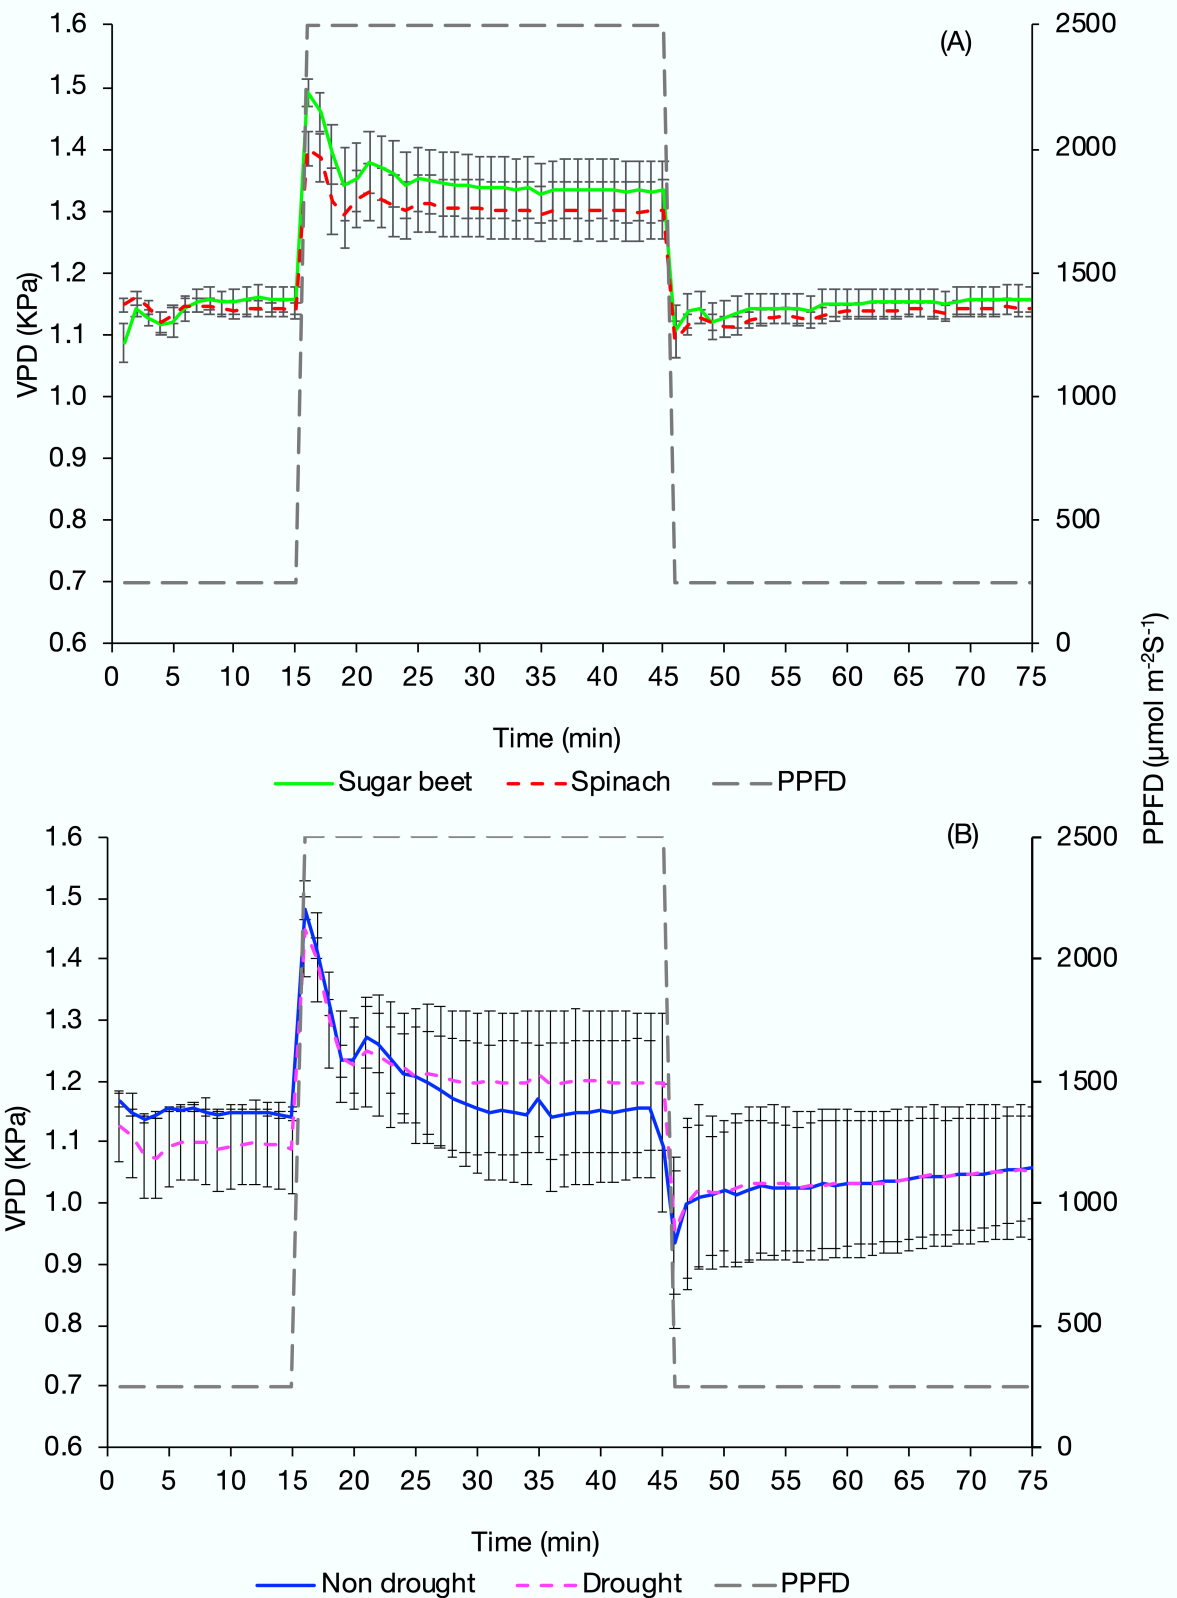

**Figure S1.** The VPD of non-drought and droughted sugar beet plants (A) and droughted and non-droughted sugar beet (B) exposed to changing PAR of  $250 \mu\text{mol m}^{-2} \text{s}^{-1}$  for 15min,  $2500 \mu\text{mol m}^{-2} \text{s}^{-1}$  for 30min and  $250 \mu\text{mol m}^{-2} \text{s}^{-1}$  for 30min, with measurements logged every minute and measured using an infrared gas analyser (Li6800, LI-COR, Lincoln, Nebraska, USA). (A)  $n = 8$  Sugar beet and 8 spinach, (B)  $n = 4$  non-droughted and 4 droughted sugar beet. Error bars show standard error.
