# Supplementary material for: Anisohydric sugar beet rapidly responds to light to optimize leaf water use efficiency utilizing numerous small stomata
Source: PubMed Central journal article supplement (PMC7780706; doi:10.1093/aobpla/plaa067), 2020-12-02
Supplement: plaa067_suppl_supplementary_figure_s2.pdf [file plaa067_suppl_supplementary_figure_s2.pdf]

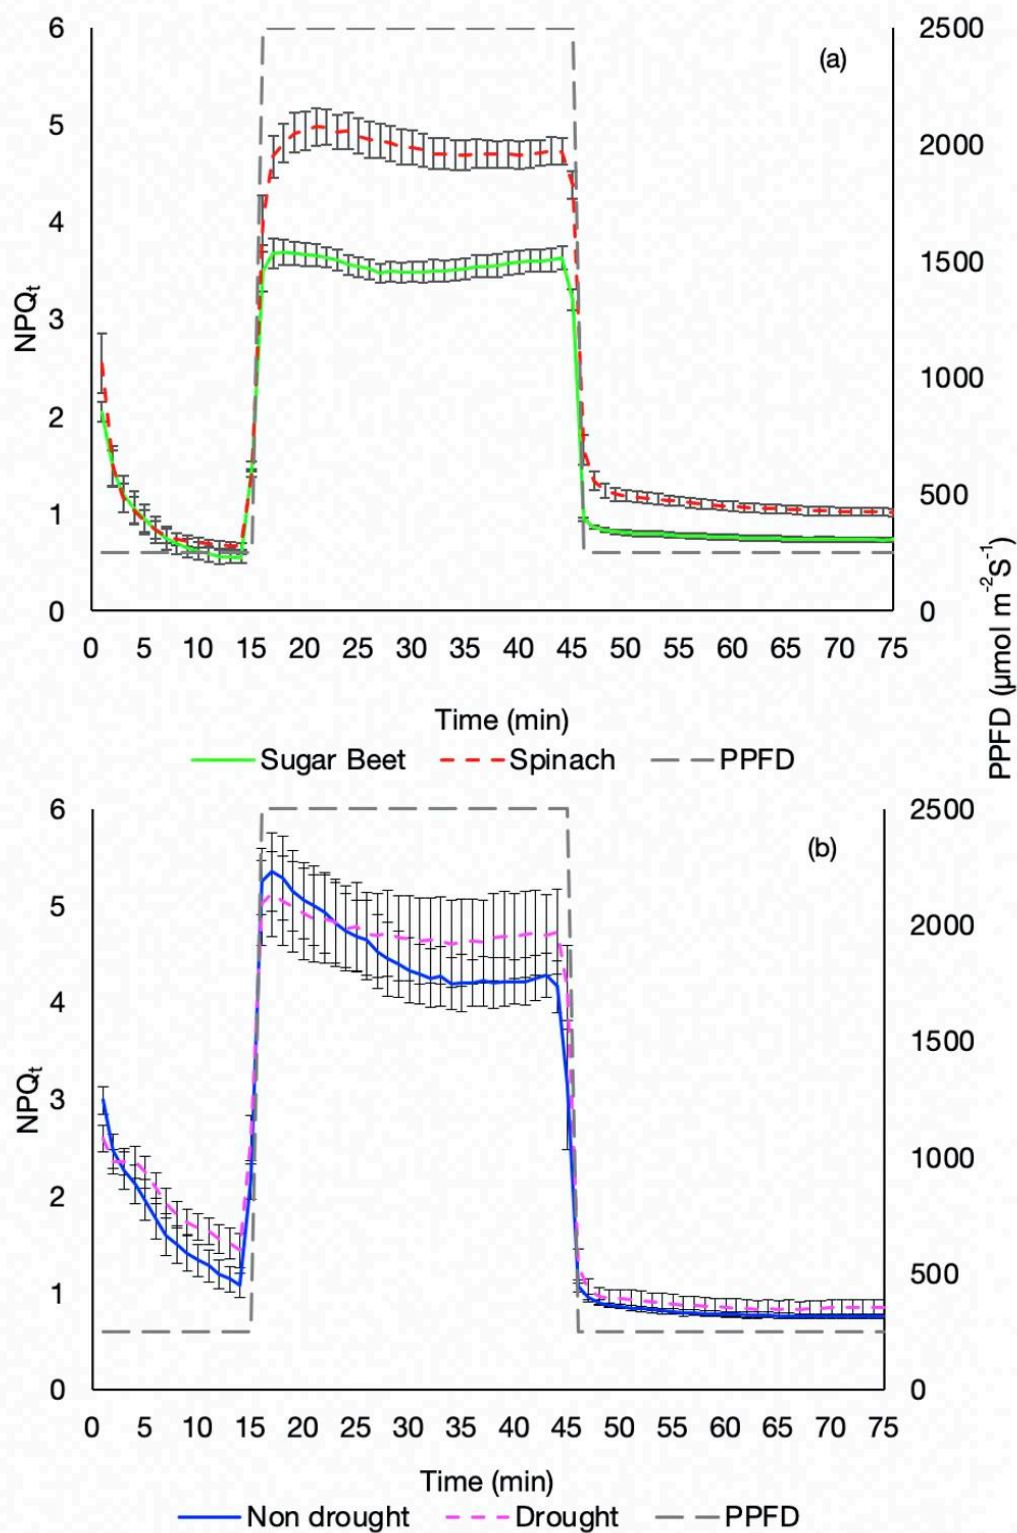

**Figure S2.** The NPQt of non-drought and droughted sugar beet plants (a) and droughted and non-droughted sugar beet (b) exposed to changing PAR of 250  $\mu\text{mol m}^{-2} \text{s}^{-1}$  for 15min, 2500  $\mu\text{mol m}^{-2} \text{s}^{-1}$  for 30min and 250  $\mu\text{mol m}^{-2} \text{s}^{-1}$  for 30min, with measurements logged every minute measured using an infrared gas analyser (Li6800, LI-COR, Lincoln, Nebraska, USA). Error bars show SE±, (a) n= 8 Sugar beet and 8 spinach, (b) n= 4 non-droughted and 4 droughted sugar beet.
